# Supplementary material for: Response to Peptide Receptor Radionuclide Therapy in Pheocromocytomas and Paragangliomas: A Systematic Review and Meta-Analysis
Source: MDPI journal article supplement (doi:10.3390/jcm12041494), 2023-02-13
Supplement: s1 [file s1]

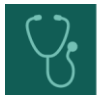

*Systematic Review*

# Response to peptide receptor radionuclide therapy in pheochromocytomas and paragangliomas: a systematic review and meta-analysis.

Supplementary

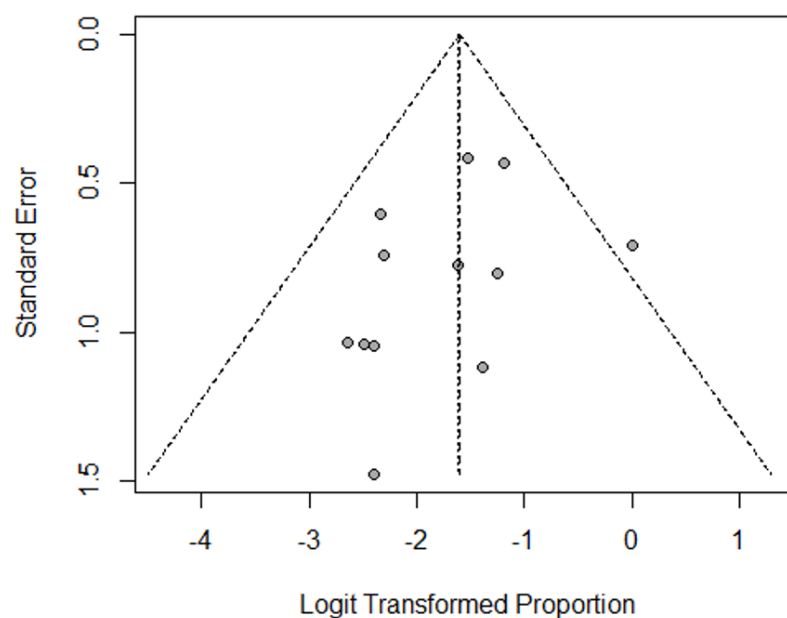

**Figure S1.** Funnel plot for response rate (complete plus partial responses) in the selected studies.

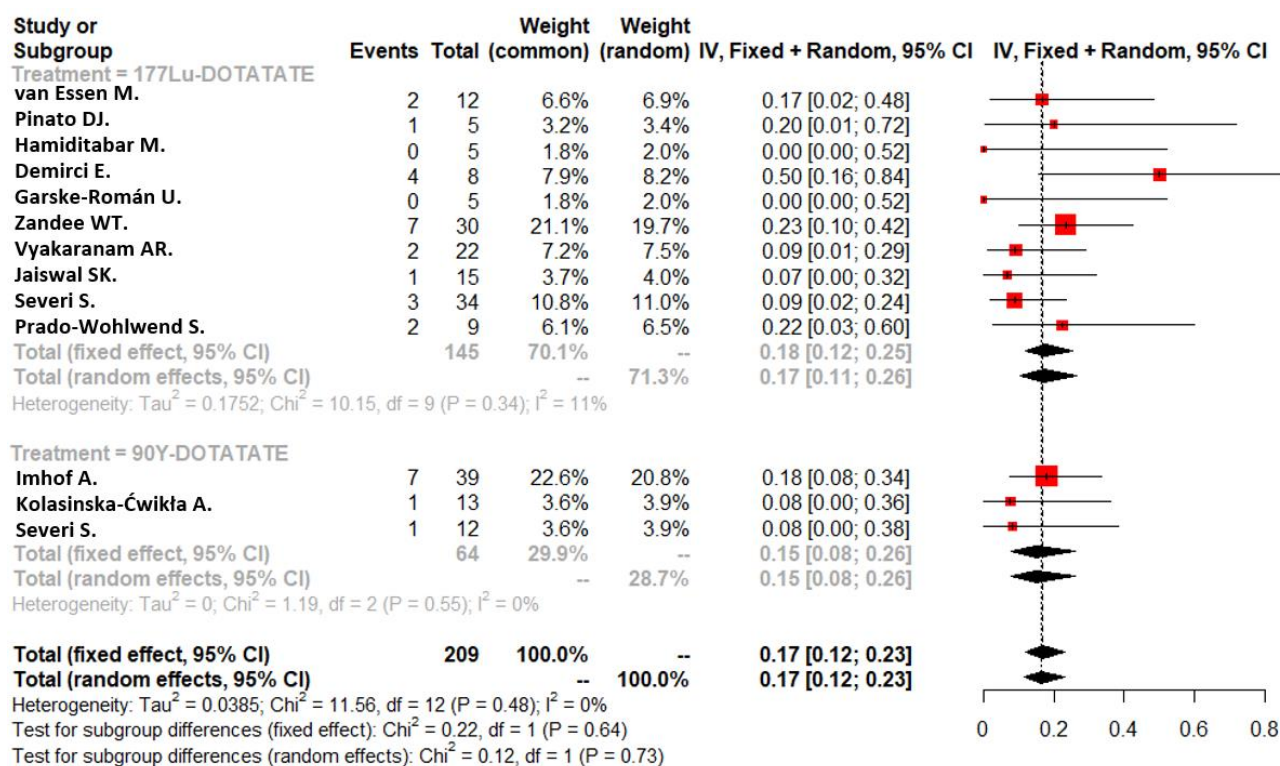

**Figure S2.** Forest plot for response rate (complete plus partial responses) in the selected articles.

**Table S1.** Pooled age and time-to-event in selected studies.

| Characteristic                          | Articles assessed               | Treatment           |               |
|-----------------------------------------|---------------------------------|---------------------|---------------|
|                                         |                                 | 177LU-DOTATATE      | 90Y-DOTATOC   |
| Patients' age (years),<br>mean (95% CI) | Garske-Román U. <i>et al.</i>   | 46.42 (38.62-54.22) | Incalculable* |
|                                         | Jaiswal SK. <i>et al.</i>       |                     |               |
|                                         | Pinato DJ. <i>et al.</i>        |                     |               |
|                                         | Prado-Wohlwend S. <i>et al.</i> |                     |               |
|                                         | Vyakaranam AR. <i>et al.</i>    |                     |               |
|                                         | Zandee WT. <i>et al.</i>        |                     |               |
| Progression-free survival<br>(months)   | Demirci E. <i>et al.</i>        | 24.5 ± 6.5          | Incalculable* |
|                                         | Garske-Román U. <i>et al.</i>   |                     |               |
|                                         | Jaiswal SK. <i>et al.</i>       |                     |               |
|                                         | Pinato DJ. <i>et al.</i>        |                     |               |
|                                         | Prado-Wohlwend S. <i>et al.</i> |                     |               |
|                                         | Vyakaranam AR. <i>et al.</i>    |                     |               |
| Overall survival (months)               | Zandee WT. <i>et al.</i>        | 48.9 ± 4.7          | Incalculable* |
|                                         | Demirci E. <i>et al.</i>        |                     |               |
|                                         | Garske-Román U. <i>et al.</i>   |                     |               |
|                                         | Pinato DJ. <i>et al.</i>        |                     |               |
|                                         | Vyakaranam AR. <i>et al.</i>    |                     |               |

\*There were no sufficient data to draw pooled age and/or time-to-event in 90Y-DOTATATE studies.  
CI: Confidence Intervals.
